# Supplementary material for: Efficacy of antioxidant supplementation in improving endocrine, hormonal, inflammatory, and metabolic statuses of PCOS: a meta-analysis and systematic review
Source: Royal Society of Chemistry journal article supplement (doi:10.1039/d3fo02824k), 2024-01-01
Supplement: d3fo02824k3.pdf [file d3fo02824k3.pdf]

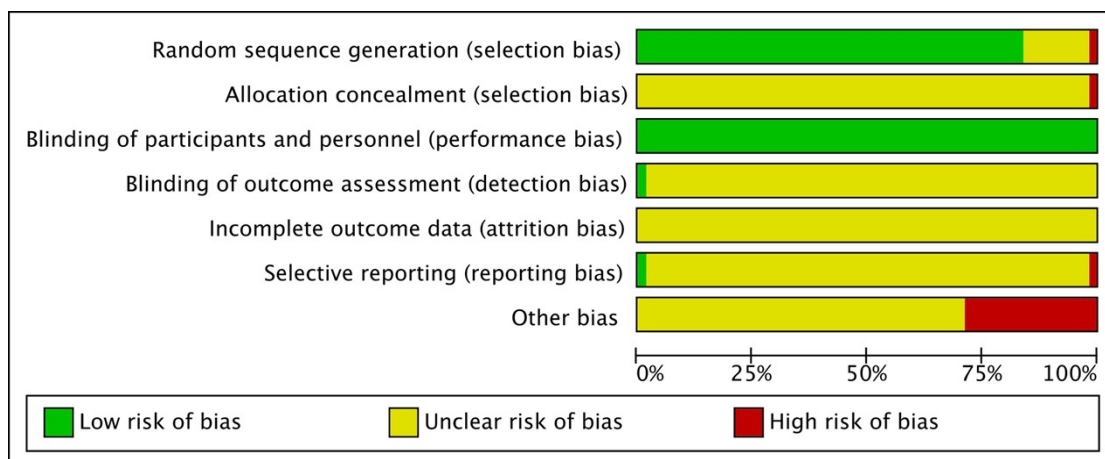

**Supplementary statement S1:** Risk of bias graph: review authors' judgements about each risk of bias item presented as percentages across all included studies.

|                                  | Random sequence generation (selection bias) | Allocation concealment (selection bias) | Blinding of participants and personnel (performance bias) | Blinding of outcome assessment (detection bias) | Incomplete outcome data (attrition bias) | Selective reporting (reporting bias) | Other bias |
|----------------------------------|---------------------------------------------|-----------------------------------------|-----------------------------------------------------------|-------------------------------------------------|------------------------------------------|--------------------------------------|------------|
| Afshar Ebrahimi, F. . 2018       | ?                                           | ?                                       | ?                                                         | ?                                               | ?                                        | ?                                    | ?          |
| Al-Bayyari, N. . 2020            | ?                                           | ?                                       | ?                                                         | ?                                               | ?                                        | ?                                    | ?          |
| Alizadeh, M. . 2021-1            | ?                                           | ?                                       | ?                                                         | ?                                               | ?                                        | ?                                    | ?          |
| Alizadeh, M. . 2021-2            | ?                                           | ?                                       | ?                                                         | ?                                               | ?                                        | ?                                    | ?          |
| Alizadeh, M. . 2021-3            | ?                                           | ?                                       | ?                                                         | ?                                               | ?                                        | ?                                    | ?          |
| Ardabili, H. R. . 2012           | ?                                           | ?                                       | ?                                                         | ?                                               | ?                                        | ?                                    | ?          |
| Asemi, Z. . 2014 (A)             | ?                                           | ?                                       | ?                                                         | ?                                               | ?                                        | ?                                    | ?          |
| Asemi, Z. . 2014 (B)             | ?                                           | ?                                       | ?                                                         | ?                                               | ?                                        | ?                                    | ?          |
| Asemi, Z. . 2015-1               | ?                                           | ?                                       | ?                                                         | ?                                               | ?                                        | ?                                    | ?          |
| Asemi, Z. . 2015-2               | ?                                           | ?                                       | ?                                                         | ?                                               | ?                                        | ?                                    | ?          |
| Asemi, Z. . 2015-3               | ?                                           | ?                                       | ?                                                         | ?                                               | ?                                        | ?                                    | ?          |
| Banaszewska, B. . 2016           | ?                                           | ?                                       | ?                                                         | ?                                               | ?                                        | ?                                    | ?          |
| Dastorani, M. . 2018             | ?                                           | ?                                       | ?                                                         | ?                                               | ?                                        | ?                                    | ?          |
| Ebrahimi, F. A. . 2016           | ?                                           | ?                                       | ?                                                         | ?                                               | ?                                        | ?                                    | ?          |
| Esmailnezhad, Z. . 2019-1        | ?                                           | ?                                       | ?                                                         | ?                                               | ?                                        | ?                                    | ?          |
| Esmailnezhad, Z. . 2019-2        | ?                                           | ?                                       | ?                                                         | ?                                               | ?                                        | ?                                    | ?          |
| Esmailnezhad, Z. . 2019-3        | ?                                           | ?                                       | ?                                                         | ?                                               | ?                                        | ?                                    | ?          |
| Chanbarzadeh-Ghashti, N. . 2023  | ?                                           | ?                                       | ?                                                         | ?                                               | ?                                        | ?                                    | ?          |
| Heshmati, J. . 2021              | ?                                           | ?                                       | ?                                                         | ?                                               | ?                                        | ?                                    | ?          |
| Izadi, A. . 2018-1               | ?                                           | ?                                       | ?                                                         | ?                                               | ?                                        | ?                                    | ?          |
| Izadi, A. . 2018-2               | ?                                           | ?                                       | ?                                                         | ?                                               | ?                                        | ?                                    | ?          |
| Izadi, A. . 2018-3               | ?                                           | ?                                       | ?                                                         | ?                                               | ?                                        | ?                                    | ?          |
| Izadi, A. . 2019-1               | ?                                           | ?                                       | ?                                                         | ?                                               | ?                                        | ?                                    | ?          |
| Izadi, A. . 2019-2               | ?                                           | ?                                       | ?                                                         | ?                                               | ?                                        | ?                                    | ?          |
| Izadi, A. . 2019-3               | ?                                           | ?                                       | ?                                                         | ?                                               | ?                                        | ?                                    | ?          |
| Jamilian, H. . 2017              | ?                                           | ?                                       | ?                                                         | ?                                               | ?                                        | ?                                    | ?          |
| Jamilian, M. . 2015              | ?                                           | ?                                       | ?                                                         | ?                                               | ?                                        | ?                                    | ?          |
| Jamilian, M. . 2015 ( 2 )        | ?                                           | ?                                       | ?                                                         | ?                                               | ?                                        | ?                                    | ?          |
| Jamilian, M. . 2015 ( 3 )        | ?                                           | ?                                       | ?                                                         | ?                                               | ?                                        | ?                                    | ?          |
| Jamilian, M. . 2015 ( 4 )        | ?                                           | ?                                       | ?                                                         | ?                                               | ?                                        | ?                                    | ?          |
| Jamilian, M. . 2016              | ?                                           | ?                                       | ?                                                         | ?                                               | ?                                        | ?                                    | ?          |
| Jamilian, M. . 2017              | ?                                           | ?                                       | ?                                                         | ?                                               | ?                                        | ?                                    | ?          |
| Jamilian, M. . 2018              | ?                                           | ?                                       | ?                                                         | ?                                               | ?                                        | ?                                    | ?          |
| Jamilian, M. . 2019              | ?                                           | ?                                       | ?                                                         | ?                                               | ?                                        | ?                                    | ?          |
| Jamilian, M. . 2019 ( 2 )        | ?                                           | ?                                       | ?                                                         | ?                                               | ?                                        | ?                                    | ?          |
| Jamilian, M. . 2019 ( 3 )        | ?                                           | ?                                       | ?                                                         | ?                                               | ?                                        | ?                                    | ?          |
| Jamilian, M. . 2020              | ?                                           | ?                                       | ?                                                         | ?                                               | ?                                        | ?                                    | ?          |
| Javed, Z. . 2019                 | ?                                           | ?                                       | ?                                                         | ?                                               | ?                                        | ?                                    | ?          |
| Karamali, M. . 2017              | ?                                           | ?                                       | ?                                                         | ?                                               | ?                                        | ?                                    | ?          |
| Kazemi, M. . 2021                | ?                                           | ?                                       | ?                                                         | ?                                               | ?                                        | ?                                    | ?          |
| Lerchbaum, E. . 2021             | ?                                           | ?                                       | ?                                                         | ?                                               | ?                                        | ?                                    | ?          |
| Maktabi, M. . 2017               | ?                                           | ?                                       | ?                                                         | ?                                               | ?                                        | ?                                    | ?          |
| Maktabi, M. . 2017 ( 2 )         | ?                                           | ?                                       | ?                                                         | ?                                               | ?                                        | ?                                    | ?          |
| Mohammad Hosseinzadeh, F. . 2015 | ?                                           | ?                                       | ?                                                         | ?                                               | ?                                        | ?                                    | ?          |
| Mousavi, R. . 2022-1             | ?                                           | ?                                       | ?                                                         | ?                                               | ?                                        | ?                                    | ?          |
| Mousavi, R. . 2022-2             | ?                                           | ?                                       | ?                                                         | ?                                               | ?                                        | ?                                    | ?          |
| Mousavi, R. . 2022-3             | ?                                           | ?                                       | ?                                                         | ?                                               | ?                                        | ?                                    | ?          |
| Nasri, K. . 2018                 | ?                                           | ?                                       | ?                                                         | ?                                               | ?                                        | ?                                    | ?          |
| Rahmani, E. . 2017               | ?                                           | ?                                       | ?                                                         | ?                                               | ?                                        | ?                                    | ?          |
| Rashidi, B. H. . 2020            | ?                                           | ?                                       | ?                                                         | ?                                               | ?                                        | ?                                    | ?          |
| Razavi, M. . 2015                | ?                                           | ?                                       | ?                                                         | ?                                               | ?                                        | ?                                    | ?          |
| Razavi, M. . 2016                | ?                                           | ?                                       | ?                                                         | ?                                               | ?                                        | ?                                    | ?          |
| Samimi, M. . 2016                | ?                                           | ?                                       | ?                                                         | ?                                               | ?                                        | ?                                    | ?          |
| Samimi, M. . 2017                | ?                                           | ?                                       | ?                                                         | ?                                               | ?                                        | ?                                    | ?          |
| Sangouni, A. A. . 2021           | ?                                           | ?                                       | ?                                                         | ?                                               | ?                                        | ?                                    | ?          |
| Seyyed Abootorabi, M. . 2018     | ?                                           | ?                                       | ?                                                         | ?                                               | ?                                        | ?                                    | ?          |
| Shabani, A. . 2019               | ?                                           | ?                                       | ?                                                         | ?                                               | ?                                        | ?                                    | ?          |
| Shokrpoor, M. 2019               | ?                                           | ?                                       | ?                                                         | ?                                               | ?                                        | ?                                    | ?          |
| Sohaei, S. . 2019                | ?                                           | ?                                       | ?                                                         | ?                                               | ?                                        | ?                                    | ?          |
| Taghizadeh, S. . 2021            | ?                                           | ?                                       | ?                                                         | ?                                               | ?                                        | ?                                    | ?          |
| Tarkesh, F. . 2020               | ?                                           | ?                                       | ?                                                         | ?                                               | ?                                        | ?                                    | ?          |
| Zadhoush, R. . 2021              | ?                                           | ?                                       | ?                                                         | ?                                               | ?                                        | ?                                    | ?          |

**Supplementary statement S2:** Risk of bias summary: review authors' judgements about each risk of bias item for each included study.



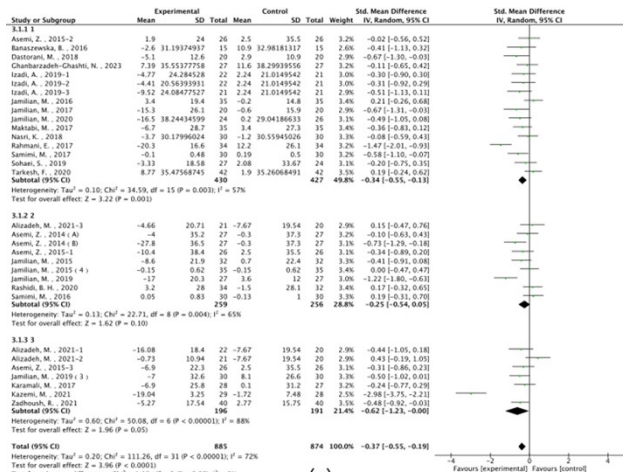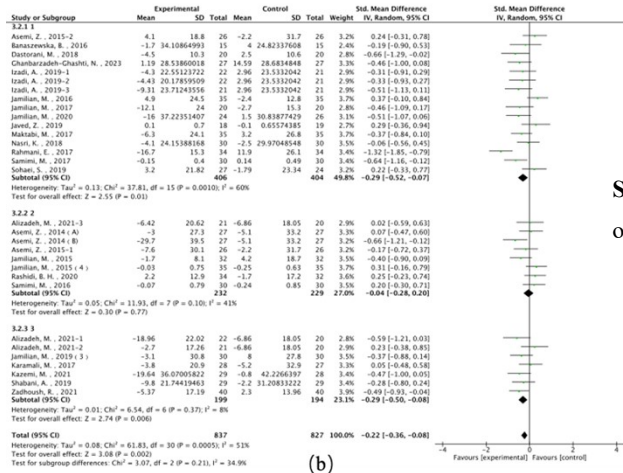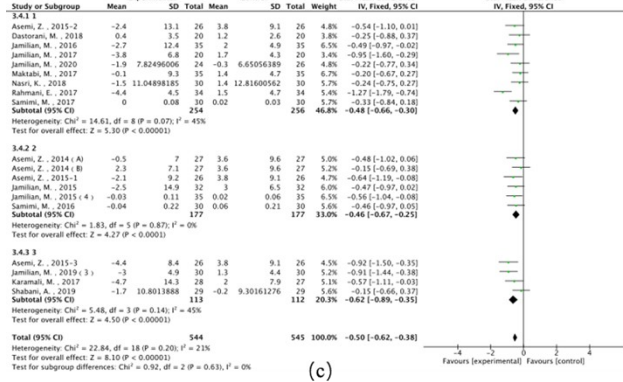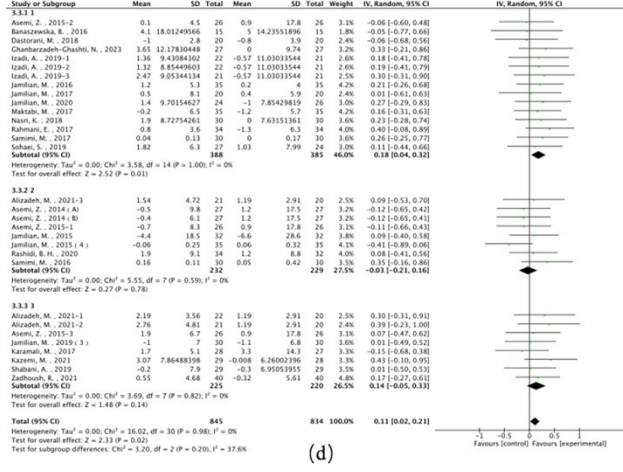

**Supplementary statement S2: Lipid metabolism in subgroup analyses of forest plot: TC(a), LDL-C(b), VLDL(c), HDL-C(d),**





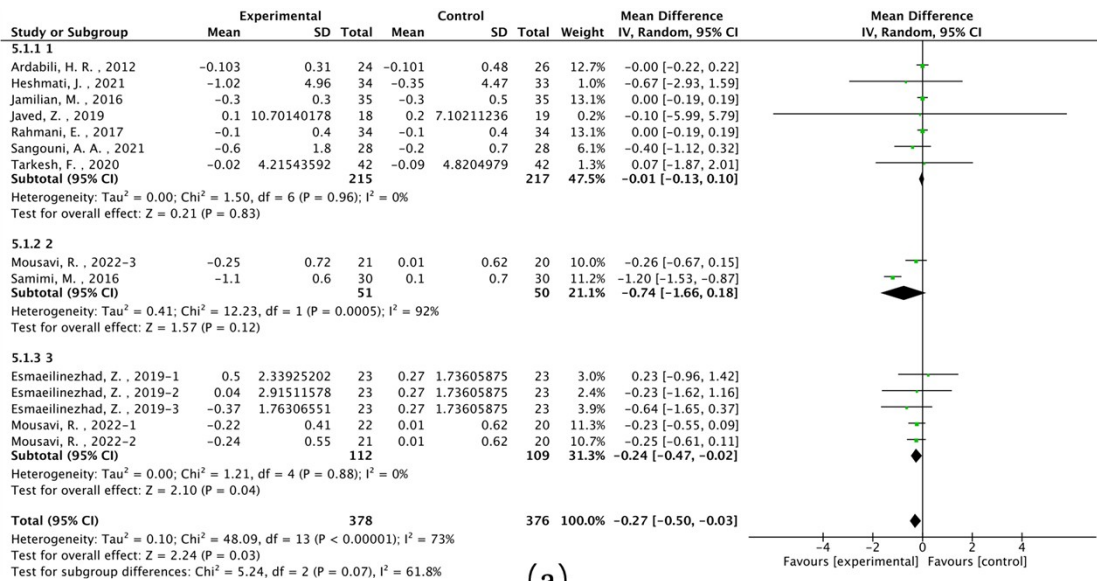

(a)

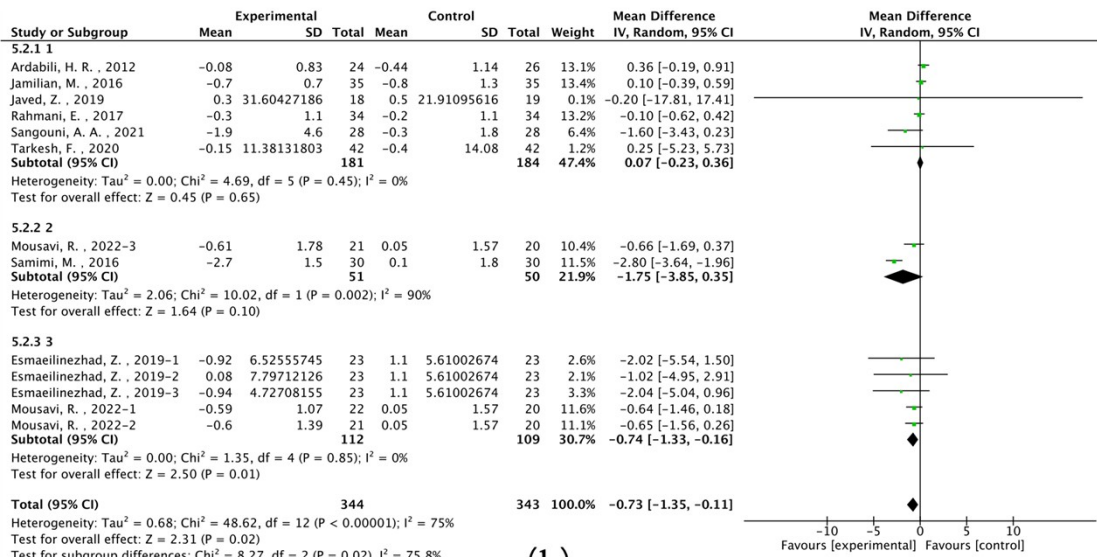

(b)

**Supplementary statement S2:** basic index in subgroup analyses of forest plot: BMI(a),Weight(c).

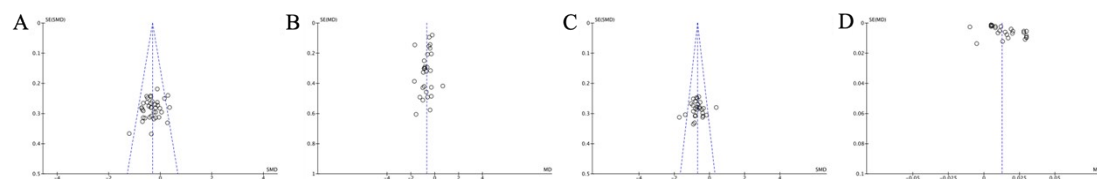

**Supplementary statement S3:** funnel plot evaluating study bias for the effects of antioxidants on glucometabolic indexes: FPG (A), HOMA-IR (B), Insulin (C), and QUICKI (D) in PCOS patients and compared with the control group.

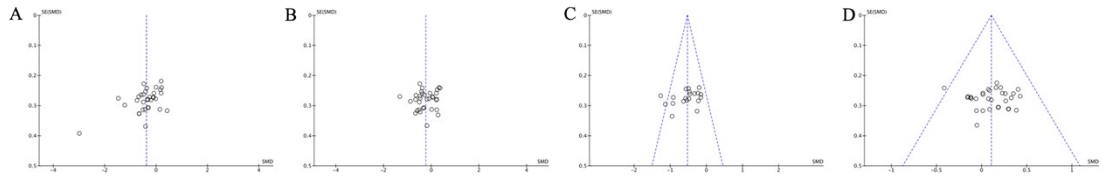

**Supplementary statement S3:** funnel plot evaluating study bias for the effects of antioxidants on lipid metabolism indexes: TC (A), LDL-R (B), VLDL (C), and HDL-C (D) in PCOS patients and compared with the control group.

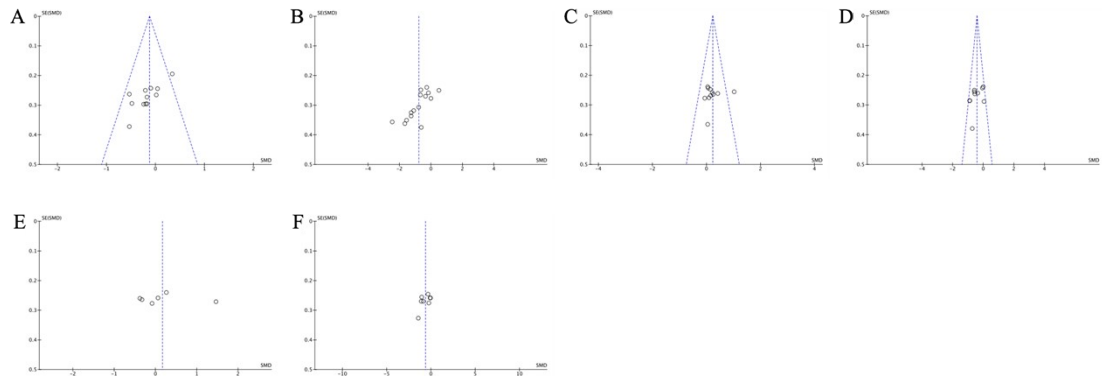

**Supplementary statement S3:** funnel plot evaluating study bias for the effects of antioxidants on lipid metabolism indexes: FSH (A), TT (B), SHBG (C), DHEAs (D), FAI(E) and M F-G SCORES (F) in PCOS patients and compared with the control group.

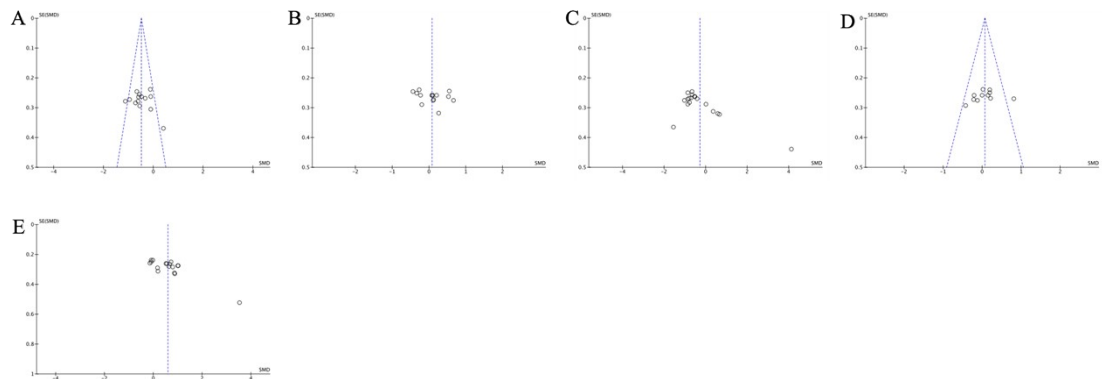

**Supplementary statement S3:** funnel plot evaluating study bias for the effects of antioxidants on lipid metabolism indexes: CRP (A), GSH (B), MDA (C), NO(D), and TAC (E) in PCOS patients and compared with the control group.

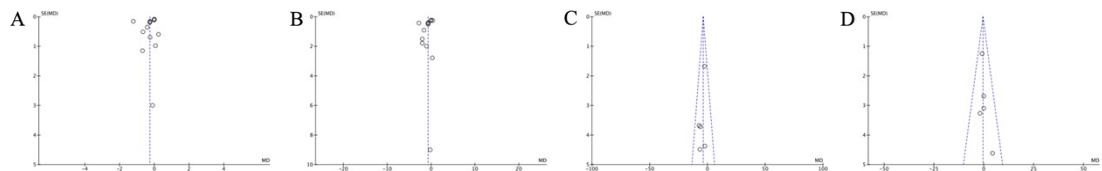

**Supplementary statement S3:** funnel plot evaluating study bias for the effects of antioxidants on lipid metabolism indexes: BMI (A), Weight (B), SBP (C), and DBP(D) in PCOS patients and compared with the control group.



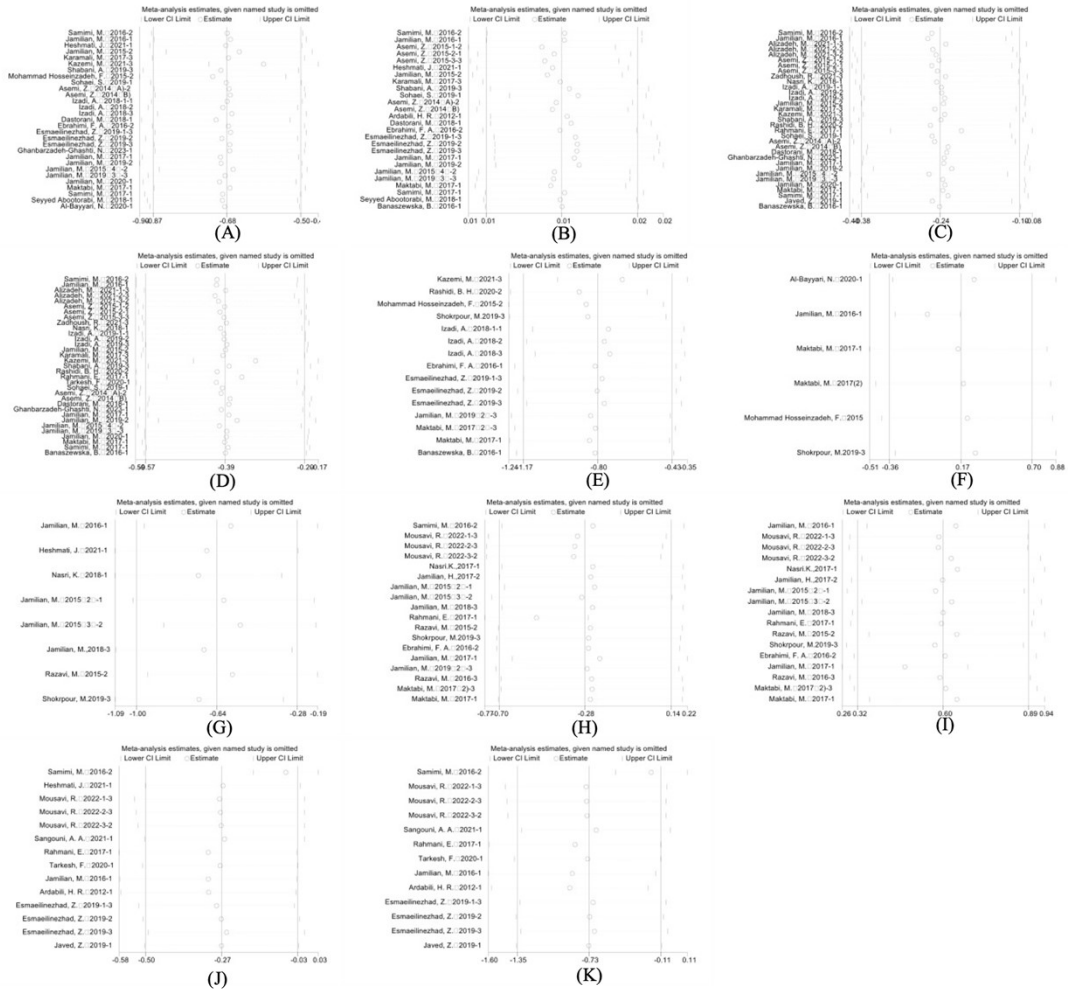

**Supplementary statement S4: Sensitivity analysis of highly heterogeneous outcome measures: HOMA-IR(A), QUICK (B), LDL-C (C), TC(D), Total testosterone(E), FAI (F), m F-G SCORES (G), MDA(H), TAC(I), BMI(J), Weight (K)**
