# Supplementary material for: Efficacy of antioxidant supplementation in improving endocrine, hormonal, inflammatory, and metabolic statuses of PCOS: a meta-analysis and systematic review
Source: Royal Society of Chemistry journal article supplement (doi:10.1039/d3fo02824k), 2024-01-01
Supplement: d3fo02824k4.pdf [file d3fo02824k4.pdf]

| Certainty assessment |                   |              |                        |              |                      |                                              | № of patients  |              | Effect            |                                                        | Certainty        | Importance |
|----------------------|-------------------|--------------|------------------------|--------------|----------------------|----------------------------------------------|----------------|--------------|-------------------|--------------------------------------------------------|------------------|------------|
| № of studies         | Study design      | Risk of bias | Inconsistency          | Indirectness | Imprecision          | Other considerations                         | [intervention] | [comparison] | Relative (95% CI) | Absolute (95% CI)                                      |                  |            |
| <b>TT</b>            |                   |              |                        |              |                      |                                              |                |              |                   |                                                        |                  |            |
| 15                   | randomised trials | not serious  | serious <sup>a</sup>   | not serious  | not serious          | strong association<br>dose response gradient | 395            | 390          | -                 | <b>SMD 0.78 lower</b><br>(1.15 lower to 0.42 lower)    | ⊕⊕⊕⊕<br>High     | CRITICAL   |
| <b>M F-G scores</b>  |                   |              |                        |              |                      |                                              |                |              |                   |                                                        |                  |            |
| 8                    | randomised trials | not serious  | not serious            | not serious  | serious <sup>b</sup> | dose response gradient                       | 241            | 241          | -                 | <b>SMD 0.63 lower</b><br>(0.98 lower to 0.28 lower)    | ⊕⊕⊕⊕<br>High     | CRITICAL   |
| <b>FPG</b>           |                   |              |                        |              |                      |                                              |                |              |                   |                                                        |                  |            |
| 38                   | randomised trials | not serious  | not serious            | not serious  | not serious          | strong association<br>dose response gradient | 1000           | 992          | -                 | <b>SMD 0.31 lower</b><br>(0.39 lower to 0.22 lower)    | ⊕⊕⊕⊕<br>High     | CRITICAL   |
| <b>HOME-IR</b>       |                   |              |                        |              |                      |                                              |                |              |                   |                                                        |                  |            |
| 29                   | randomised trials | not serious  | serious <sup>c</sup>   | not serious  | not serious          | dose response gradient                       | 788            | 780          | -                 | <b>MD 0.68 lower</b><br>(0.87 lower to 0.5 lower)      | ⊕⊕⊕⊕<br>High     | CRITICAL   |
| <b>TC</b>            |                   |              |                        |              |                      |                                              |                |              |                   |                                                        |                  |            |
| 33                   | randomised trials | not serious  | serious <sup>d</sup>   | not serious  | not serious          | dose response gradient                       | 914            | 903          | -                 | <b>SMD 0.38 lower</b><br>(0.56 lower to 0.2 lower)     | ⊕⊕⊕⊕<br>High     | CRITICAL   |
| <b>TAC</b>           |                   |              |                        |              |                      |                                              |                |              |                   |                                                        |                  |            |
| 17                   | randomised trials | not serious  | serious <sup>d</sup>   | not serious  | not serious          | dose response gradient                       | 477            | 474          | -                 | <b>SMD 0.59 higher</b><br>(0.31 higher to 0.87 higher) | ⊕⊕⊕⊕<br>High     | CRITICAL   |
| <b>MDA</b>           |                   |              |                        |              |                      |                                              |                |              |                   |                                                        |                  |            |
| 18                   | randomised trials | not serious  | serious <sup>d</sup>   | not serious  | not serious          | dose response gradient                       | 505            | 502          | -                 | <b>SMD 0.28 lower</b><br>(0.69 lower to 0.14 higher)   | ⊕⊕⊕⊕<br>High     | CRITICAL   |
| <b>Weight</b>        |                   |              |                        |              |                      |                                              |                |              |                   |                                                        |                  |            |
| 13                   | randomised trials | not serious  | serious <sup>a,c</sup> | not serious  | serious <sup>b</sup> | dose response gradient                       | 344            | 343          | -                 | <b>MD 0.73 lower</b><br>(1.35 lower to 0.11 lower)     | ⊕⊕⊕○<br>Moderate | CRITICAL   |

CI: confidence interval; MD: mean difference; SMD: standardised mean difference

## Explanations

- a. It is possible that there is heterogeneity in androgens themselves
- b. Too few included studies
- c. There is certain heterogeneity among different detection methods
- d. High heterogeneity due to variability in antioxidants and PCOS patients
- e. Patient weight inconsistencies lead to high heterogeneity

Table S1.GRADE assessment to evaluate the evidence
